# Supplementary material
Source: Springer Nature journal article supplement (https://www.springermedizin.de/resource/supplementary/12936_2013_3182_MOESM3_ESM.pdf/9545222)

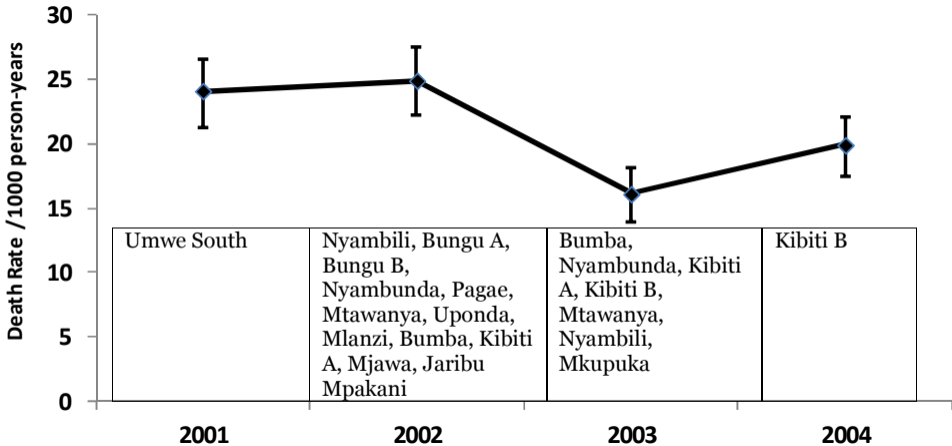

Supplement: MOESM3 [file 9545222]
